# Supplementary material for: Corticosteroid-Dependent Leukocytosis Masks the Predictive Potential of White Blood Cells for Delayed Cerebral Ischemia and Ventriculoperitoneal Shunt Dependency in Aneurysmatic Subarachnoid Hemorrhage
Source: MDPI journal article supplement (doi:10.3390/jcm12031006), 2023-01-28
Supplement: s1 [file s1]

### Univariate Analysis for Delayed cerebral ischemia

| Parameter                                    | No Dexamethasone |               |                   | Dexamethasone given |               |               |
|----------------------------------------------|------------------|---------------|-------------------|---------------------|---------------|---------------|
|                                              | DCI              | no DCI        | p                 | DCI                 | no DCI        | p             |
| Age (n=251)                                  | 55.97 ± 12.02    | 56.71 ± 14.16 | 0.120             | 52.75 ± 13.93       | 54.05 ± 13.18 | 0.47          |
| Gender (female) (n=251)                      | 28 (32.9%)       | 57 (34.3%)    | 0.889             | 32 (33.7%)          | 43 (31.4%)    | 0.776         |
| Hunt & Hess (n=251)                          | 2 (range 1-5)    | 2 (range 1-5) | 0.626             | 4 (range 1-5)       | 3 (range 1-5) | <b>0.002*</b> |
| Fisher (n=246)                               | 4 (range 1-4)    | 4 (range 1-4) | <b>0.026*</b>     | 4 (range 1-4)       | 4 (range 1-4) | 0.069         |
| Acute Hydrocephalus (n=248)                  | 63 (75.0%)       | 93 (56.7%)    | <b>0.005*</b>     | 80 (58.8%)          | 75 (78.9%)    | <b>0.002*</b> |
| Intracerebral Hemorrhage (n=243)             | 19 (23.5%)       | 30 (18.5%)    | 0.398             | 35 (38.7%)          | 58 (42.6%)    | 0.768         |
| Treatment of Aneurysm (Endovascular) (n=233) | 62 (74.7%)       | 125 (83.3%)   | 0.124             | 66 (71.7%)          | 60 (48.8%)    | <b>0.001*</b> |
| at admission (n=239)                         | 12.40 ± 4.59     | 11.98 ± 3.98  | 0.468             | 13.79 ± 5.20        | 12.92 ± 4.85  | 0.199         |
| d3 (n=233)                                   | 11.59 ± 3.91     | 10.88 ± 3.87  | 0.186             | 15.95 ± 5.67        | 15.68 ± 6.09  | 0.74          |
| WBC d7 (n=217)                               | 11.47 ± 3.98     | 9.81 ± 2.81   | <b>0.002*</b>     | 13.53 ± 4.89        | 13.56 ± 5.36  | 0.958         |
| d14 (n=174)                                  | 11.88 ± 4.68     | 9.58 ± 3.48   | <b>&lt;0.001*</b> | 16.53 ± 7.05        | 15.08 ± 6.82  | 0.186         |
| peak within 72h (n=233)                      | 15.68 ± 4.46     | 14.38 ± 4.67  | <b>0.04*</b>      | 19.19 ± 5.83        | 18.19 ± 5.89  | 0.21          |
| Persistent Leukocytosis (n=217)              | 34 (44.2%)       | 40 (27.4%)    | <b>0.016*</b>     | 55 (61.8%)          | 70 (59.8%)    | 0.886         |
| at admission (n=240)                         | 13.24 ± 26.89    | 9.40 ± 15.39  | 0.161             | 11.06 ± 14.72       | 10.07 ± 13.42 | 0.604         |
| d3 (n=234)                                   | 84.61 ± 71.13    | 65.68 ± 63.01 | <b>0.038*</b>     | 85.19 ± 75.59       | 83.48 ± 75.87 | 0.869         |
| CRP d7 (n=218)                               | 50.97 ± 53.13    | 41.40 ± 50.15 | 0.187             | 42.85 ± 60.09       | 38.36 ± 57.12 | 0.586         |
| d14 (n=174)                                  | 42.40 ± 50.89    | 26.41 ± 31.74 | <b>0.012*</b>     | 49.52 ± 56.67       | 32.47 ± 42.79 | <b>0.031*</b> |
| peak within 72h (n=234)                      | 95.72 ± 71.94    | 76.07 ± 69.59 | <b>0.041*</b>     | 99.37 ± 73.71       | 87.33 ± 74.46 | 0.234         |

**Supplement Table S1**

### **Multivariate Regression for Delayed Cerebral Ischemia**

#### **No Dexamethasone**

| <b>Parameter</b>               | <b>Odds ratio<br/>(95% CI)</b> | <b>p-value</b> |
|--------------------------------|--------------------------------|----------------|
| <b>Fisher</b>                  | 1.174<br>(0.740-1.861)         | 0.495          |
| <b>WBC peak within 72h</b>     | 0.986<br>(0.907-1.071)         | 0.986          |
| <b>Persistent Leukocytosis</b> | 1.894<br>(1.033-3.475)         | 0.569          |
| <b>CRP d3</b>                  | 1.003<br>(0.999-1.008)         | 0.16           |
| <b>CRP peak within 72h</b>     | 0.995<br>(0.982-1.008)         | 0.445          |

#### **Dexamethasone given**

| <b>Parameter</b>           | <b>Odds ratio<br/>(95% CI)</b> | <b>p-value</b> |
|----------------------------|--------------------------------|----------------|
| <b>Acute Hydrocephalus</b> | 1.338<br>(0.57-3.139)          | 0.504          |
| <b>CRP d14</b>             | 1.005<br>(0.998 -1.012)        | 0.136          |

**Supplement Table S2**

### Univariate Analysis for Shunt dependency

| Parameter                                    | No Dexamethasone |               |                    | Dexamethasone given |               |               |
|----------------------------------------------|------------------|---------------|--------------------|---------------------|---------------|---------------|
|                                              | Shunt            | no Shunt      | p                  | Shunt               | no Shunt      | p             |
| Age (n=250)                                  | 60.13 ± 13.47    | 56.01 ± 13.42 | 0.154              | 55.88 ± 13.95       | 53.01 ± 13.33 | 0.217         |
| Gender (female) (n=250)                      | 7 (29.2%)        | 77 (34.1%)    | 0.821              | 10 (24.4%)          | 66 (34.4%)    | 0.272         |
| Hunt & Hess (n=251)                          | 4 (range 1-5)    | 2 (range 1-5) | <b>0.004*</b>      | 3 (range 1-5)       | 3 (range 1-5) | 0.266         |
| Fisher (n=246)                               | 4 (range 1-4)    | 4 (range 1-4) | <b>0.008*</b>      | 4 (range 1-4)       | 4 (range 1-4) | 0.078         |
| Acute Hydrocephalus (n=247)                  | 24 (100.0%)      | 131 (58.7%)   | <b>&lt;0.0001*</b> | 36 (87.8%)          | 120 (62.8%)   | <b>0.002*</b> |
| Intracerebral Hemorrhage (n=242)             | 7 (30.4%)        | 42 (19.2%)    | 0.272              | 24 (56.5%)          | 70 (37.7%)    | <b>0.033*</b> |
| Treatment of Aneurysm (Endovascular) (n=232) | 19 (79.2%)       | 167 (80.3%)   | 1                  | 25 (61.0%)          | 102 (58.3%)   | <b>0.86</b>   |
| at admission (n=238)                         | 12.79 ± 4.59     | 12.07 ± 4.15  | 0.445              | 14.50 ± 4.72        | 13.06 ± 4.72  | 0.341         |
| d3 (n=232)                                   | 12.10 ± 3.29     | 11.03 ± 3.96  | 0.213              | 17.48 ± 7.02        | 15.45 ± 5.60  | <b>0.049*</b> |
| WBC d7 (n=216)                               | 12.76 ± 4.71     | 10.13 ± 3.07  | <b>0.005*</b>      | 14.58 ± 5.41        | 13.36 ± 5.11  | 0.183         |
| d14 (n=173)                                  | 11.95 ± 3.01     | 10.27 ± 4.27  | 0.67               | 17.27 ± 6.75        | 15.27 ± 6.95  | 0.12          |
| peak within 72h (n=232)                      | 15.90 ± 4.40     | 14.7 ± 4.66   | 0.243              | 19.95 ± 6.61        | 18.36 ± 5.70  | 0.125         |
| Persistent Leukocytosis (n=216)              | 14 (60.9%)       | 60 (30.2%)    | <b>0.005*</b>      | 26 (66.7%)          | 100 (59.5%)   | 0.469         |
| at admission (n=239)                         | 24.81 ± 39.49    | 9.22 ± 16.37  | 0.068              | 11.36 ± 15.17       | 10.27 ± 13.68 | 0.665         |
| d3 (n=233)                                   | 109.44 ± 69.19   | 67.55 ± 64.48 | <b>0.004*</b>      | 99.18 ± 81.54       | 81.44 ± 74.11 | 0.188         |
| CRP d7 (n=217)                               | 55.81 ± 52.94    | 43.61 ± 51.23 | 0.274              | 48.59 ± 51.94       | 38.91 ± 59.91 | 0.353         |
| d14 (n=173)                                  | 43.83 ± 41.35    | 31.05 ± 41.14 | 0.16               | 43.00 ± 51.87       | 40.44 ± 50.68 | 0.788         |
| peak within 72h (n=233)                      | 133.74 ± 70.50   | 76.80 ± 68.55 | <b>&lt;0.0001*</b> | 108.47 ± 76.12      | 89.24 ± 73.57 | 0.145         |

Supplement Table S3

### **Multivariate Regression for Shunt dependency**

#### **No Dexamethasone**

| <b>Parameter</b>               | <b>Odds ratio<br/>(95% CI)</b> | <b>p-value</b> |
|--------------------------------|--------------------------------|----------------|
| <b>Hunt &amp; Hess</b>         | 1.326<br>(0.889-1.978)         | 0.167          |
| <b>Fisher score</b>            | 2.071<br>(0.689-6.225)         | 0.173          |
| <b>Acute Hydrocephalus</b>     | not computable <sup>†</sup>    |                |
| <b>Persistent Leukocytosis</b> | 0.952<br>(0.226-4.007)         | 0.942          |
| <b>CRP d3</b>                  | 0.993<br>(0.997-1.010)         | 0.433          |

† all patients requiring a shunt had an acute hydrocephalus, therefore it is impossible to include this parameter in a multivariate regression model, see supplement Table 3

#### **Dexamethasone given**

| <b>Parameter</b>                | <b>Odds ratio<br/>(95% CI)</b> | <b>p-value</b> |
|---------------------------------|--------------------------------|----------------|
| <b>Intracerebral Hemorrhage</b> | 2.412<br>(1.175-4.953)         | 0.16           |
| <b>WBC d3</b>                   | 1.049                          | 0.115          |

**Supplement Table S4**
